# Supplementary material for: Adherence and Satisfaction of Smartphone- and Smartwatch-Based Remote Active Testing and Passive Monitoring in People With Multiple Sclerosis: Nonrandomized Interventional Feasibility Study
Source: PubMed Central journal article supplement (PMC6743265; doi:10.2196/14863), 2019-08-30
Supplement: jmir_v21i8e14863_app3.pdf [file jmir_v21i8e14863_app3.pdf]

**Multimedia Appendix 3.** Participants discontinuing from study and excluded from adherence analysis.

| Cohort | Participant ID | Reason for withdrawing from study                                                                   | Excluded from adherence analysis |
|--------|----------------|-----------------------------------------------------------------------------------------------------|----------------------------------|
| PwMS   | 1015           | Monitoring frequency-related burden                                                                 |                                  |
| PwMS   | 1019           | The participant did not have enough time to implement all study requirements                        |                                  |
| HC     | 1025           | Due to personal reasons, the participant was not able to continue with the study                    |                                  |
| HC     | 1035           | Lack of availability                                                                                | X                                |
| HC     | 1036           | Lack of availability because of new job                                                             | X                                |
| HC     | 1047           | Privacy of data. The participant was not comfortable with the fact that the smartphone had GPS      |                                  |
| HC     | 1052           | Participant's personal reasons                                                                      |                                  |
| PwMS   | 1061           | Adverse event                                                                                       | X                                |
| HC     | 1062           | Lack of availability to come to the visits                                                          | X                                |
| HC     | 1076           | The participant started to work and did not have availability to come to CEMCAT for the final visit | X                                |
| PwMS   | 2001           | Walking task was too exhausting. Concerned about accuracy of data (due to walking task)             |                                  |
| HC     | 2004           | The participant did not want to complete tasks                                                      |                                  |
| PwMS   | 2006           | Travel time to get to study site                                                                    |                                  |
| PwMS   | 2009           | Lack of time/interest                                                                               |                                  |
| HC     | 2014           | Lives 4 hours away. Was unable to come for last visit                                               | X                                |

**Legend:** CEMCAT: Multiple Sclerosis Centre of Catalonia; GPS: Global Positioning System; HC: healthy control; PwMS: people with multiple sclerosis.
